# Supplementary material for: Remarkably enhanced photocatalytic activity of ordered mesoporous carbon/g-C3N4 composite photocatalysts under visible light
Source: Royal Society of Chemistry journal article supplement (doi:10.1039/c4dt00087k), 2014-01-01
Supplement: c4dt00087k1.pdf [file c4dt00087k1.pdf]

## Supporting Information

### **Remarkably enhanced photocatalytic activity of ordered mesoporous carbon/g- C<sub>3</sub>N<sub>4</sub> composites photocatalyst under visible light**

Lei Shi<sup>b</sup>, Lin Liang<sup>a,c</sup>, Jun Ma<sup>a</sup>, Fangxiao Wang<sup>b</sup>, Jianmin Sun<sup>a,b\*</sup>

a: State Key Laboratory of Urban Water Resource and Environment, Harbin Institute of Technology, Harbin 150080, China

b: The Academy of Fundamental and Interdisciplinary Science, Harbin Institute of Technology, Harbin 150080, China

c: School of Life Science and Technology, Harbin Institute of Technology, Harbin 150080, China

\*Corresponding author. Tel: +86 451 86403715;

E-mail address: sunjm@hit.edu.cn

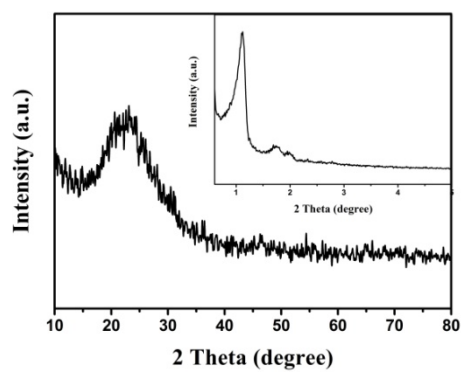

**Figure 1.** The XRD pattern of SBA-15 (Inset is the SAXRD pattern).

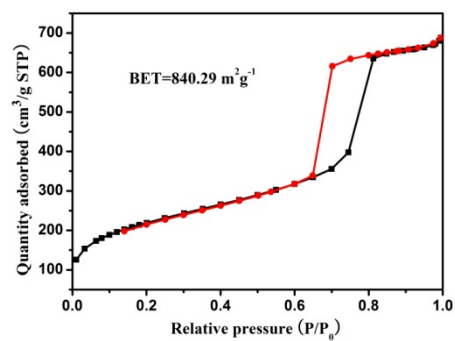

**Figure 2.** N<sub>2</sub> adsorption-desorption isotherms of SBA-15.

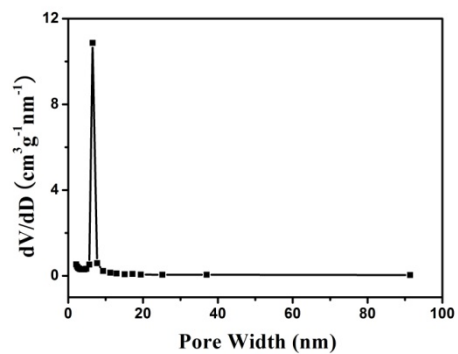

**Figure 3.** Pore size distribution of SBA-15.
